# Supplementary material
Source: PubMed Central journal article supplement (PMC2924807)
Supplement: NIHMS212680-supplement-Supp_Data.pdf [file NIHMS212680-supplement-Supp_Data.pdf]

**Strategies for the Synthesis of Fusicocanes via  
Nazarov Reactions of Dolabelladienones.  
Total Synthesis of (+)-Fusicoauritone**

*David R. Williams,\* Leslie A. Robinson, C. Richard Nevill and  
Jayachandra P. Reddy*

Department of Chemistry, Indiana University, Bloomington, IN, 47405-7102, U.S.A.

**Supporting Information**

Spectral data for identification of key compounds **16**, **17ab**, **18**, **22**, **23**, **24ab**, and **1** and ORTEP illustrations from the X-ray diffraction study of **25**. <sup>1</sup>H NMR spectra of synthetic and natural fusicoauritone (**1**).

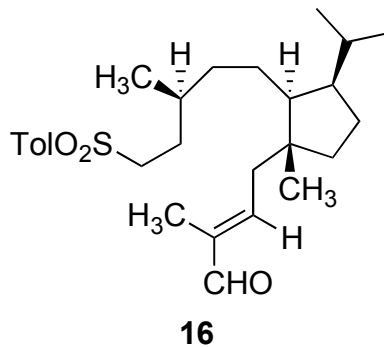

*Spectral characterization of 16 as a colorless oil:* IR (film) 2960, 2880, 1680, 1640, 1600, 1470, 1320, 1150, 1090  $\text{cm}^{-1}$ ;  $^1\text{H}$  NMR (300 MHz,  $\text{CDCl}_3$ )  $\delta$  9.42 (s, 1H), 7.78 (d,  $J = 8.2$  Hz, 2H), 7.36 (d,  $J = 8.2$  Hz, 2H), 6.53 (m, 1H), 3.06 (m, 2H), 2.46 (s, 3H), 2.35 (AB of ABX,  $J_{\text{AB}} = 15.2$  Hz,  $J_{\text{AX}} = 7.0$  Hz,  $J_{\text{BX}} = 7.0$  Hz,  $\Delta\nu_{\text{AB}} = 63.4$  Hz, 2H), 1.75 (s, 3H), 1.75 (m, 2H), 1.60–1.12 (m, 12H), 1.00 (s, 3H), 0.88 (d,  $J = 7.0$  Hz, 3H), 0.86 (d,  $J = 6.6$  Hz, 3H), 0.81 (d,  $J = 7.0$  Hz, 3H);  $^{13}\text{C}$  NMR (125.8 MHz,  $\text{CDCl}_3$ )  $\delta$  195.3 (d), 152.6 (d), 144.6 (s), 140.6 (s), 136.3 (s), 129.9 (d), 128.0 (d), 54.5 (t), 50.8 (d), 48.4 (d), 46.3 (s), 41.6 (t), 37.6 (t), 37.1 (t), 32.9 (d), 29.6 (d), 29.1 (t), 27.4 (t), 23.2 (q), 22.2 (q), 22.0 (q), 21.9 (t), 21.6 (q), 19.2 (q), 9.6 (q); MS (CI,  $m/z$ , relative intensity) 429 (15), 361 (32), 319 (19), 207 (42), 157 (63), 123 (53), 95 (99); HRMS calcd for  $\text{M}^{++} + 1$ : 447.2935, found: 447.2940.

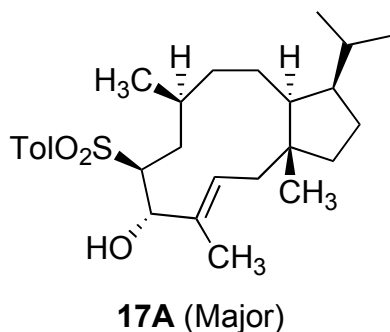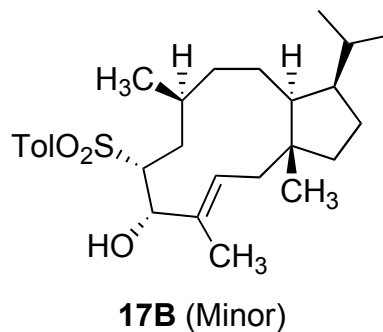

*Spectral characterization of 17A (Major Isomer):* mp 171–172  $^{\circ}\text{C}$ ; IR ( $\text{CHCl}_3$ ) 3505, 3015, 2960, 1600, 1460, 1385, 1380, 1290, 1140, 1090  $\text{cm}^{-1}$ ;  $^1\text{H}$  NMR (300 MHz,

CDCl<sub>3</sub>) δ 7.82 (m, 2H), 7.39 (m, 2H), 5.60 (dd,  $J = 12.3$  Hz,  $J = 3.0$  Hz, 1H), 4.67 (s, 1H, –OH), 4.39 (d,  $J = 10.2$  Hz, 1H), 3.00 (m, 1H), 2.48 (s, 3H), 2.24 (1/2 AB of ABX,  $J_{AB} = 12.7$  Hz, 1H), 1.94–1.72 (m, 2H), 1.72–0.90 (m, 13H), 1.68 (s, 3H), 0.92 (s, 3H), 0.84 (d,  $J = 5.9$  Hz, 3H), 0.80 (d,  $J = 6.2$  Hz, 3H), 0.47 (d,  $J = 7.0$  Hz, 3H); MS (25 eV,  $m/z$ , relative intensity) 361 (4), 319 (3), 273 (5), 229 (3), 137 (5), 123 (5), 95 (8), 69 (100); HRMS calcd for M<sup>+</sup>: 446.2856, found: 446.2848.

*Spectral characterization of 17B (Minor Product) (same IR and MS/HRMS as above):*

<sup>1</sup>H NMR (300 MHz, CDCl<sub>3</sub>) δ 6.0 (m, 1H), 4.57 (m, 1H), 3.40 (s, 1H), 2.86 (m, 1H), 2.18 (m, 1H), 1.00 (s, 3H), 0.85 (d,  $J = 5.9$  Hz, 3H).

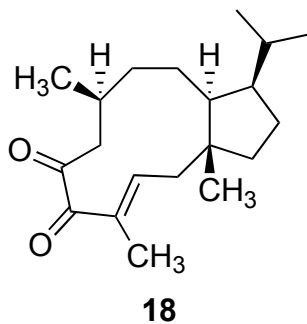

*Spectroscopic characterization of diketone 18:* IR (film) 2950, 1705, 1665, 1635, 1450, 1380, 1375, 1210, 1000 cm<sup>-1</sup>; UV (CHCl<sub>3</sub>) λ<sub>max</sub> 360 (63); <sup>1</sup>H NMR(300 MHz, CDCl<sub>3</sub>) δ 6.64 (m, 1H), 2.47 (AB of ABX,  $J_{AB} = 12.9$  Hz,  $J_{AX} = 12.5$  Hz,  $J_{BX} = 2.7$  Hz, Δν<sub>AB</sub> = 184.5 Hz, 2H), 2.34 (AB of ABX,  $J_{AB} = 14.1$  Hz,  $J_{AX} = 11.6$  Hz,  $J_{BX} = 4.1$  Hz, Δν<sub>AB</sub> = 26.7 Hz, 2H), 1.85 (s, 3H), 1.80 (m, 1H), 1.62–1.32 (m, 7H), 1.31–1.12 (m, 4H), 1.09 (s, 3H), 0.98 (d,  $J = 7.0$  Hz, 3H), 0.87 (d,  $J = 5.9$  Hz, 3H), 0.81 (d,  $J = 5.9$  Hz, 3H); <sup>13</sup>C NMR (75.5 MHz, CDCl<sub>3</sub>) δ 208.0, 199.2, 153.2, 134.6, 53.5, 49.4, 45.7, 45.4, 44.7, 41.4, 34.1, 28.3, 27.7, 26.4, 23.8, 22.2, 22.1, 21.0, 20.9, 10.1; MS (CI, NH<sub>3</sub>,  $m/z$ , relative

intensity) 305 (11), 304 (19), 289 (17), 262 (19), 261 (100), 233 (35), 215 (52), 195 (28);

HRMS (CI, NH<sub>3</sub>) calcd for [M<sup>+</sup> +1]: 305.2482, found: 305.2477.

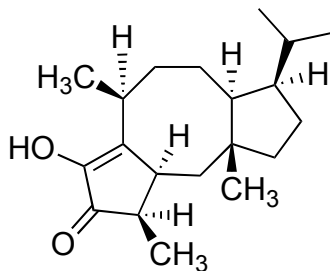

**19**

*Spectral characterization of 19:* IR (CHCl<sub>3</sub>) 3410, 2960, 1695, 1460, 1390, 1385, 1250, 1050, 910 cm<sup>-1</sup>; UV (CHCl<sub>3</sub>) λ<sub>max</sub> 379 (5,750), 270 (12,650); <sup>1</sup>H NMR (300 MHz, CDCl<sub>3</sub>) δ 5.88 (br s, 1H, -OH), 2.99 (m, 1H), 2.85 (m, 1H), 2.61 (dq, *J* = 6.0 Hz, *J* = 6.4 Hz, 1H), 2.01 (AB of ABX, *J*<sub>AB</sub> = 13.1 Hz, *J*<sub>AX</sub> = 2.7 Hz, *J*<sub>BX</sub> = 0.4 Hz, Δ*v*<sub>AB</sub> = 15.5 Hz, 2H), 1.90–1.15 (m, 11H), 1.11 (d, 7.4 Hz, 3H), 1.09 (s, 3H), 1.07 (d, *J* = 7.0 Hz, 3H), 0.88 (d, *J* = 6.6 Hz, 3H), 0.83 (d, *J* = 6.6 Hz, 3H); <sup>13</sup>C NMR (125.8 MHz, CDCl<sub>3</sub>) δ 204.4, 161.5, 147.2, 55.2, 54.1, 49.8, 47.2, 45.9, 41.7, 38.3, 32.6, 32.0, 27.6, 27.0, 26.2, 24.1, 22.4, 21.8, 21.4, 10.5; MS (CI, NH<sub>3</sub>, *m/z*, relative intensity) 305 (15), 261 (32), 191 (18), 165 (46), 140 (41), 125 (68), 109 (37), 95 (58); HRMS (CI, NH<sub>3</sub>) calcd for [M<sup>+</sup> +1]: 305.2482, found, 305.2481.

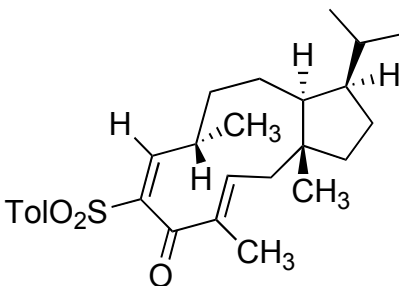

**22**

*Spectral characterization of 22:*  $R_f = 0.3$  (20% EtOAc/hexanes); mp 184 °C (dec.); IR (film) 2950, 1640, 1600, 1460, 1380, 1305, 1250, 1220, 1150  $\text{cm}^{-1}$ ;  $^1\text{H}$  NMR (400 MHz,  $\text{CDCl}_3$ )  $\delta$  7.73 (d,  $J = 8.3$  Hz, 2H), 7.32 (d,  $J = 8.1$  Hz, 2H), 6.88 (d,  $J = 11.5$  Hz, 1H), 6.72 (dd,  $J = 10.7$  Hz,  $J = 1.1$  Hz, 1H), 2.54–2.47 (m, 1H), 2.43 (s, 3H), 2.37 (d,  $J = 14.3$  Hz, 1H), 2.07 (d,  $J = 14.3$  Hz, 1H), 1.80–1.70 (m, 2H), 1.79 (s, 3H), 1.67–0.95 (m, 9H), 1.03 (s, 3H), 0.93 (d,  $J = 6.4$  Hz, 3H), 0.86 (d,  $J = 6.7$  Hz, 3H), 0.82 (d,  $J = 6.7$  Hz, 3H);  $^{13}\text{C}$  NMR (101 MHz,  $\text{CDCl}_3$ )  $\delta$  193.05, 152.13, 148.92, 144.29, 142.15, 138.95, 137.47, 129.59, 128.31, 48.01, 46.50, 45.34, 42.82, 42.63, 35.79, 32.62, 26.51, 25.99, 24.40, 24.21, 23.44, 21.62, 20.68, 20.44, 11.07; MS (CI,  $\text{NH}_3$ ,  $m/z$ , relative intensity) 443 (79), 287 (67), 149 (57), 107 (89), 91 (100); HRMS (CI,  $\text{NH}_3$ ) calcd for  $[\text{M}^{+} + 1]$  443.2622, found: 443.2619.

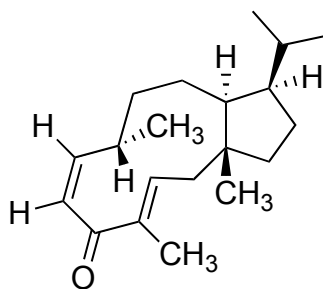

**23**

*Spectral characterization of 23 as a colorless oil:*  $R_f = 0.45$  (20% EtOAc/hexanes); IR (film) 2940, 1645, 1450, 1385, 1305, 1250, 1210, 1165, 1070, 940, 785, 735;  $^1\text{H}$  NMR (400 MHz,  $\text{CDCl}_3$ ) 6.68 (ddd,  $J = 11.8$  Hz,  $J = 2.9$  Hz,  $J = 1.4$  Hz, 1H), 5.99 (d,  $J = 11.8$  Hz, 1H), 5.70 (t,  $J = 11.4$  Hz, 1H), 2.67 (m, 1H), 2.40 (dd,  $J = 14.5$  Hz,  $J = 12.1$  Hz, 1H), 2.05 (d,  $J = 14.5$  Hz, 1H), 1.81 (s, 3H), 1.76–1.21 (m, 11H), 1.04 (s, 3H), 0.86 (d,  $J = 6.5$  Hz, 3H), 0.85 (d,  $J = 6.7$  Hz, 3H), 0.81 (d,  $J = 6.7$  Hz, 3H);  $^{13}\text{C}$  NMR (101 MHz,  $\text{CDCl}_3$ ) 200.27, 146.85, 143.39, 139.15, 128.52, 48.94, 46.10, 44.97, 43.38, 42.94, 36.04, 31.64,

26.67, 26.30, 24.13, 23.95, 22.79, 21.63, 20.65, 11.33; MS (CI, NH<sub>3</sub>, *m/z*, relative intensity) 289 (8), 245 (13), 109 (42), 84 (100); HRMS (CI, NH<sub>3</sub>) calcd for [M<sup>+</sup> + 1]: 289.2533, found: 289.2510.

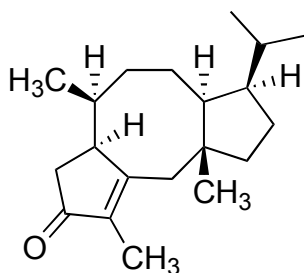

**24A**

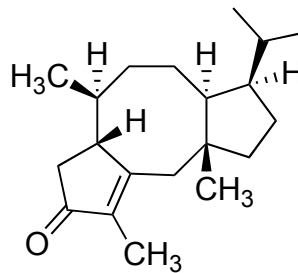

**24B**

*Spectroscopic characterization of 24A*: *R<sub>f</sub>* = 0.3 (20% EtOAc/hexanes); IR (film) 2925, 1695, 1625, 1450, 1380 cm<sup>-1</sup>; <sup>1</sup>H NMR (400 MHz, CDCl<sub>3</sub>) δ 2.82 (d, *J* = 12.4 Hz, 1H), 2.73 (m, 1H), 2.40 (m, 1H), 2.34 (dd, *J* = 18.3 Hz, *J* = 6.1, 1H), 2.12 (m, 2H), 2.10 (dd, *J* = 18.3 Hz, *J* = 4.0 Hz, 1H), 2.02 (d, *J* = 12.4 Hz, 1H), 1.70 (d, *J* = 2.2 Hz, 3H), 1.70–1.13 (m, 9H), 0.99 (d, *J* = 7.0 Hz, 3H), 0.87 (d, *J* = 6.4 Hz, 3H), 0.80 (d, *J* = 6.7 Hz, 3H), 0.76 (s, 3H); <sup>13</sup>C NMR (101 MHz, CDCl<sub>3</sub>) 209.20, 175.78, 138.77, 49.36, 48.00, 47.70, 47.06, 43.61, 43.43, 35.98, 29.31, 28.22, 27.39, 24.68, 24.29, 22.06, 21.61, 19.86, 19.76, 9.87; MS (CI, NH<sub>3</sub>, *m/z*, relative intensity) 289 (27), 245 (37), 137 (100), 81 (27); HRMS (CI, NH<sub>3</sub>) calcd for [M<sup>+</sup> + 1]: 289.2533, found: 289.2503.

*Spectroscopic characterization of 24B* (same IR and MS/HRMS as above): <sup>1</sup>H NMR (400 MHz, CDCl<sub>3</sub>) δ 2.88 (d, *J* = 12.3 Hz, 1H), 2.64 (dd, *J* = 18.2 Hz, *J* = 6.5 Hz, 1H), 2.33 (d, *J* = 18.2 Hz, 1H), 2.26 (m, 1H), 2.07 (dd, *J* = 12.3 Hz, *J* = 3.7 Hz, 1H), 1.90 (m, 3H), 1.78–1.17 (m, 9H), 1.73 (d, *J* = 2.1 Hz, 3H), 1.05 (d, *J* = 6.8 Hz, 3H), 0.98 (s, 3H), 0.86 (d, *J* = 6.8 Hz, 3H), 0.84 (d, *J* = 6.4 Hz, 3H).

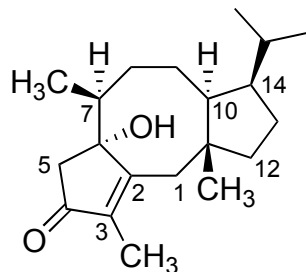

Fusicoauritone (**1**)

*Characterization of Synthetic 1:*  $R_f$  0.28 (30% EtOAc/hexanes);  $[\alpha]_D^{24} +13.3$  ( $c$  0.21,  $\text{CHCl}_3$ ); IR (film) 3445, 2970, 2935, 2880, 1702, 1468, 1390, 1050, 1020, 975, 955  $\text{cm}^{-1}$ ;  $^1\text{H}$  NMR (400 MHz,  $\text{CDCl}_3$ )  $\delta$  2.71 (d,  $J = 12.8$  Hz, 1H), 2.46 (d,  $J = 18.4$  Hz, 1H), 2.27 (d,  $J = 18.4$  Hz, 1H), 2.22 (d,  $J = 13.2$  Hz, 1H), 2.19–2.10 (m, 3H), 2.05 (s, 1H), 1.73 (s, 3H), 1.71–1.55 (m, 6H), 1.30–1.25 (m, 3H), 1.11 (d,  $J = 7.2$  Hz, 3H), 0.90 (d,  $J = 6.4$  Hz, 3H), 0.84 (d,  $J = 6.8$  Hz, 3H), 0.79 (s, 3H);  $^{13}\text{C}$  NMR (101 MHz,  $\text{CDCl}_3$ )  $\delta$  207.8, 173.6, 139.6, 83.1, 48.5, 47.2, 46.9, 44.3, 44.0, 40.3, 33.4, 30.2, 28.0, 24.5, 24.4, 22.9, 20.0, 19.5, 17.6, 9.5; MS (CI,  $\text{NH}_3$ )  $m/z$  (relative intensity) 304 ( $\text{M}^+$ ), 179 (100), 137 (80), 95 (72); HRMS (CI,  $\text{NH}_3$ ) calcd for  $\text{C}_{20}\text{H}_{33}\text{O}_2$  [ $\text{M}^++1$ ]: 305.2475, found: 305.2471.

**$^{13}\text{C}$  NMR (101 MHz,  $\text{CDCl}_3$ ) Spectral Data Comparison of Natural and Synthetic Fusicoauritone (**1**)**

| Carbon Number | Natural <b>1</b> | Synthetic <b>1</b> |
|---------------|------------------|--------------------|
| 1             | 40.3             | 40.3               |
| 2             | 173.3            | 173.6              |
| 3             | 139.7            | 139.6              |
| 4             | (212.8*)         | 207.8*             |
| 5             | 44.0             | 44.0               |
| 6             | 83.1             | 83.1               |
| 7             | 33.4             | 33.4               |
| 8             | 30.2             | 30.2               |
| 9             | 22.9             | 22.9               |
| 10            | 48.6             | 48.5               |
| 11            | 46.9             | 46.9               |
| 12            | 44.3             | 44.3               |
| 13            | 24.5             | 24.5               |

|    |      |      |
|----|------|------|
| 14 | 47.3 | 47.2 |
| 15 | 28.1 | 28.0 |
| 16 | 20.0 | 20.0 |
| 17 | 24.5 | 24.4 |
| 18 | 17.6 | 17.6 |
| 19 | 9.5  | 9.5  |
| 20 | 19.6 | 19.5 |

\*The carbonyl carbon signal  $\delta$  212.8 was not directly observed in the  $^{13}\text{C}$  NMR spectrum of natural fusicoauritone (**1**). Its value was taken from the HMBC data.



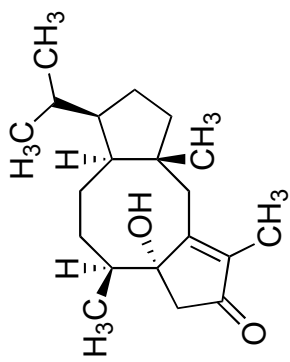

**1**

Synthetic Fusicoauritone  
<sup>1</sup>H NMR (400 MHz, CDCl<sub>3</sub>)

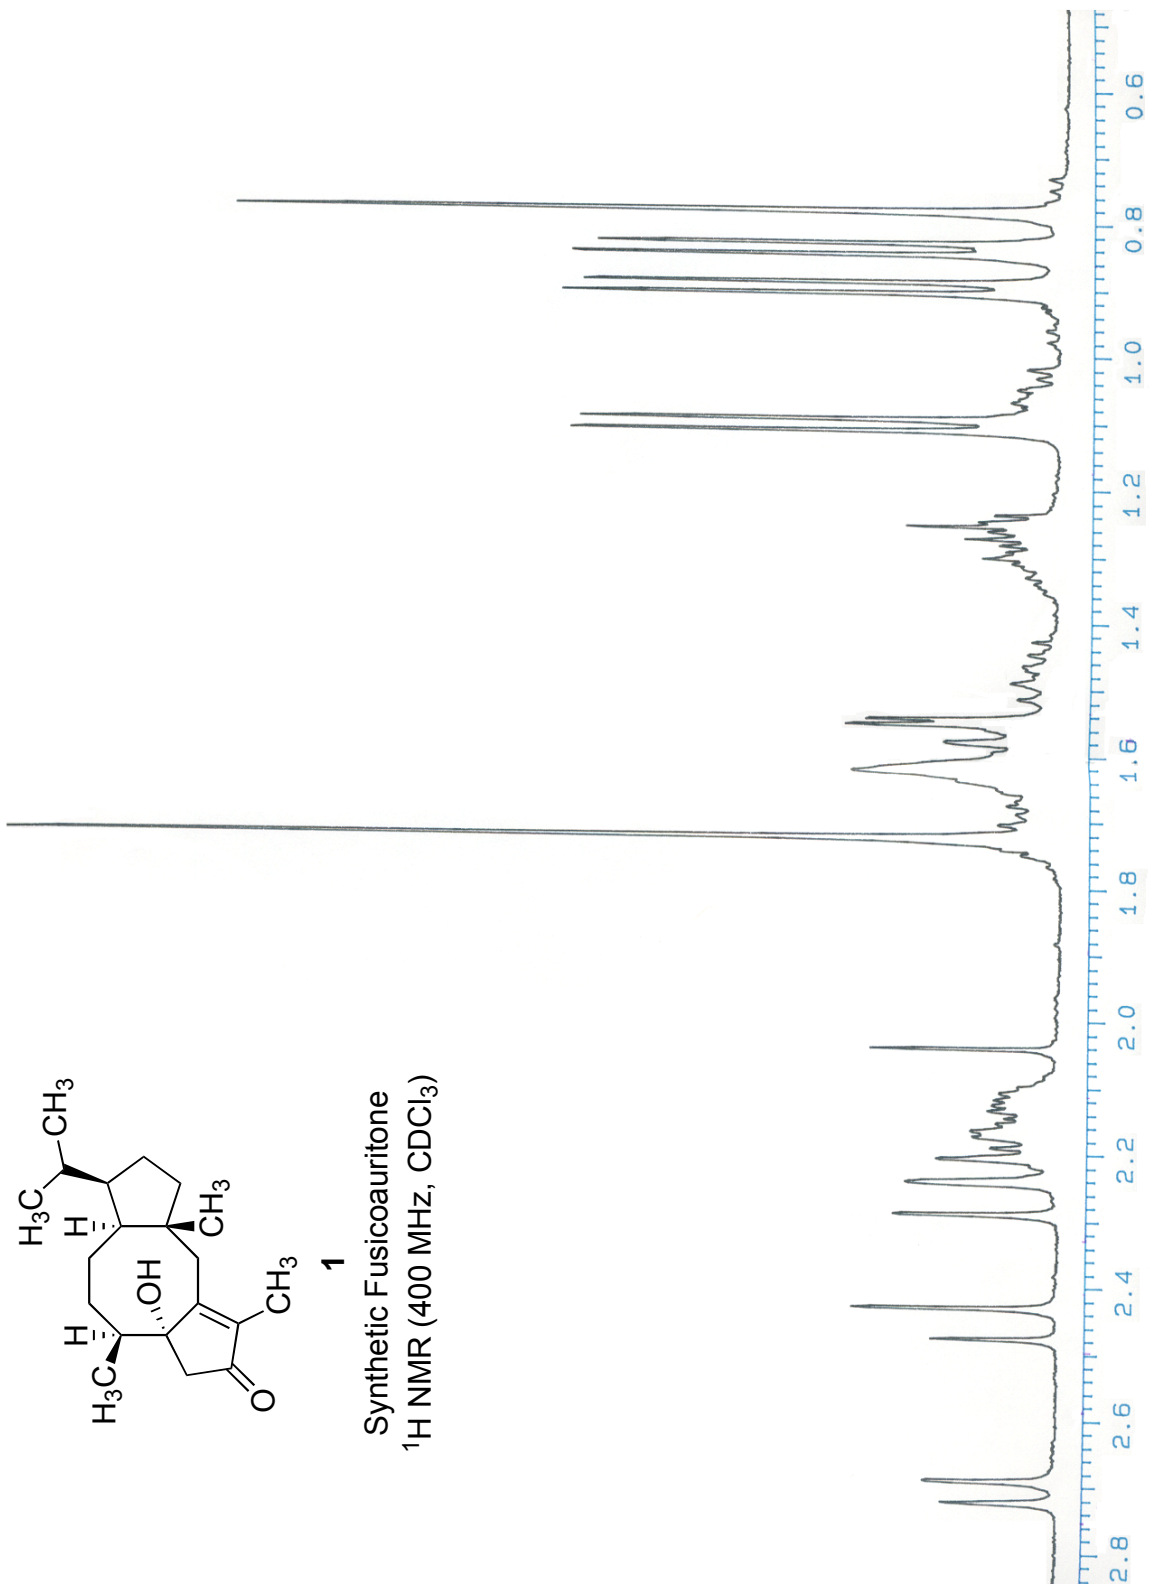

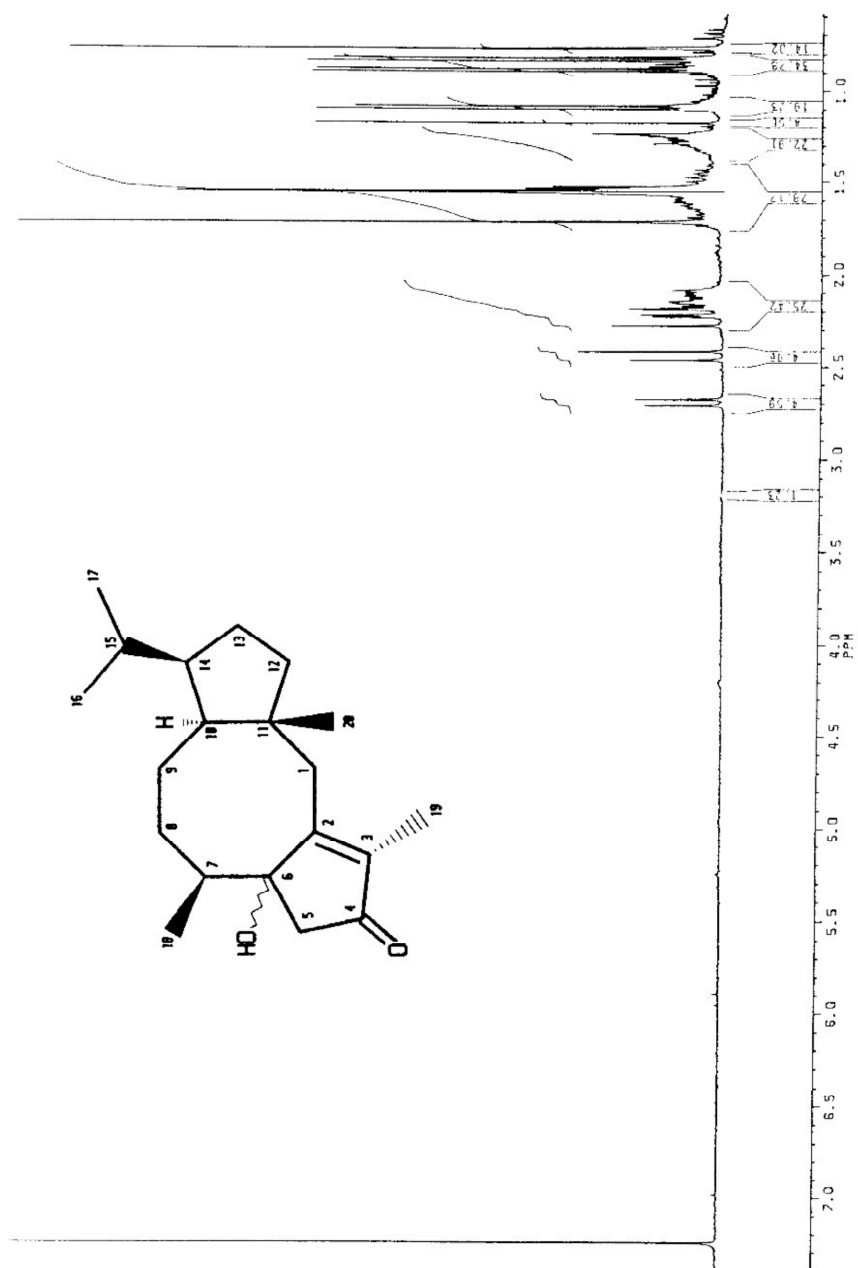

A7.2: <sup>1</sup>H - NMR - Spektrum
